# Supplementary material
Source: publisher site journal article supplement (https://www.dovepress.com/article/363545)
Supplement: Supplementary file 1 [file get_supplementary_file.php]

**C1. STUDY PROTOCOL**

**Postoperative pain relief following pancreaticoduodenectomy:**

**The Triple P (PostPainPan) Study**

**Protocol**  Version 3.0

**Date** November 11th, 2019
**Protocol number:** P18.061

**CCMO/ABR number:** **NL64936.058.18**

**CONTENT**

1. **Administrative information:**- Abbreviations
   - World Health Organization Trial Registration Dataset
2. **Introduction:**- Background and rationale
   - Objectives & hypothesis
   - Study design
3. **Methods: Participants, strategies, outcomes**- Study setting
   - Eligibility criteria
   - Strategies
   - Outcomes
   - Time-line
   - Sample size- Recruitment
4. **Methods: Assignment of strategy**- Allocation- Blinding
5. **Methods: Data collection, management, analysis**- Data collection methods
   - Data management
   - Statistical methods
6. **Methods: monitoring**- Patient Safety Monitoring
   - Study Monitoring
7. **Safety
   -** Recovery after pancreaticoduodenectomy- Adverse Events
   - Serious Adverse Events
   - Data Monitory Committee (DMC)
8. **Ethics and dissemination**- Ethical approval
   - Ethical conduct of the study
   - Protocol amendments
   - Subject information and consent
   - Ancillary studies
   - Confidentiality
   - Declaration of interests
9. **ADMINISTRATIVE INFORMATION**

**Abbreviations**

EA Epidural analgesia

N-EA Non epidural analgesia (all other forms of analgesia)

IVPCAM Intravenous patient controlled analgesia with morphine

PD Pancreaticoduodenectomy

SST Sublingual sufentanil tablets

ASA American Society of Anesthesiologists

PACU Post Anaesthesia Care Unit

NRS Numerical Rating Score

NSAID Non-Steroidal Anti-Inflammatory Drugs

ICU Intensive Care Unit

DMC Data Monitory Committee

AE Adverse Event

SAE Serious Adverse Event

METC Medisch Ethische ToetsingsCommissie (Medical Ethics Committee)

CCMO Centrale Commissie Mensgebonden Onderzoek (Central Committee on Research Involving Human Subjects)

**World Health Organization Trial Registration Dataset**

| **DATA CATEGORY** | **INFORMATION** |
| --- | --- |
| Primary registry and trial identification number | Netherlands Trial Register: NTR7318 |
| Protocol version | Version 3.0 (November 11th , 2019) |
| Primary sponsor | Leiden University Medical Center Address: Albinusdreef 2, 2333 ZA, Leiden |
| Contact for public queries | **Prof. dr. Albert Dahan,** A.Dahan@lumc.nl |
| Contact for scientific queries | **Drs. Jesse Groen,** J.V.Groen@lumc.nl |
| Public title | The Triple P (PostPainPan) Study |
| Scientific title | Postoperative pain relief following pancreaticoduodenectomy? A multicenter strategy study in the Netherlands |
| Principle investigator | **Prof. dr. Albert Dahan**  Department of Anesthesiology Anesthesia & Pain Research Unit, Leiden University Medical Center Phone: +3171526 2301/4554  Mail: A.Dahan@lumc.nl |
| Co-investigators | **Dr. Jaap Vuyk** J.Vuyk@lumc.nl  **Dr. Chris Martini** C.H.Martini@lumc.nl  **Dr. Sesmu Arbous** M.S.Arbous@lumc.nl  **Prof. dr. Leon Aarts** L.P.H.J.Aarts@lumc.nl  **Drs. Puck Bauer** P.A.Bauer@lumc.nl  Department of Anesthesiology/Anesthesia & Pain Research Unit, Leiden University Medical Center, Leiden  **Drs. Jesse Groen** J.V.Groen@lumc.nl  **Dr. Sven Mieog** J.S.D.Mieog@lumc.nl  **Dr. Bert Bonsing** B.A.Bonsing@lumc.nl  Department of Surgery, Leiden University Medical Center, Leiden |
| Independent physician | **Dr. Elise Sarton**  Mail: [e.y.sarton@lumc.nl](mailto:a.dahan@lumc.nl)  Department of Anesthesiology, Leiden University Medical Center |
| Statistical analysis | **Prof. dr. Hein Putter**  Department of Statistics, Leiden University Medical Center |
| Main study site | Leiden University Medical Center  Albinusdreef 2, 2300 RC Leiden, The Netherlands  PO Box 9600 |
| Health condition(s) or problem(s) studied | Postoperative pain relief, pancreaticoduodenectomy |
| Strategies | Active comparator: sublingual sufentanil tablets Passive comparator: epidural analgesia or intravenous patient controlled analgesia with morphine |
| Key inclusion and exclusion criteria | Inclusion criteria: ASA class 1-3 patients, aged 18 and older that will undergo an elective pancreaticoduodenectomy under general anesthesia. Exclusion criteria: Patients that are unable to give written informed consent. Patients with a contra-indication for: (epidural analgesia and intravenous patient controlled analgesia with morphine) or sublingual sufentanil tablets (e.g. allergies, coagulopathies), inability to operate the sublingual sufentanil tablet system, chronic opioid use (>12 weeks), complex chronic pain disorders, liver failure (Child-Pugh class C). |
| Study type | Investigator-initiated, open-label, strategy, multicenter randomized-controlled trial |
| Target sample size | 47 patients |
| Primary outcome(s) | Mean pain score during postoperative day 1-3 and mean pain satisfaction score during postoperative day 1-3 |
| Key secondary outcomes | Mean daily pain scores (day 0-dicharge).  Mean daily pain satisfaction scores beyond day 3 till discharge.  Number of patients reporting a NRS > 4 on day 1 till discharge.  Overall Benefit of Analgesia Score on day 1, 2 and 3  Anesthesiological and surgical outcomes. |

1. **INTRODUCTION**

**Background and rationale**

Pancreaticoduodenectomy (PD) is the treatment of choice for a myriad of (non-) malignant diseases of the pancreas, duodenum and periampullary region. PD is performed under general anesthesia and in a restricted number of hospitals in the Netherlands. In this procedure the head of the pancreas and part of the duodenum are removed. There are various methods for postoperative pain control with varying levels of postoperative pain scores and patient satisfaction.
 In Figure 1 we give LUMC data of the percentage of PD patients with a postoperative pain score > 4 (on an 11-point scale from 0, no pain to 10, most extreme pain imaginable) for patients that received an epidural analgesia (EA) and those that received another form of postoperative pain treatment (most importantly intravenous patient controlled analgesia with morphine, IVPCAM) for the first 10 postoperative days. EA and IVPCAM are considered the ‘standard-of-care’ following PD in the LUMC. While the percentage of patients not receiving EA had higher pain scores on day 0 (day of surgery), the opposite was true on day 3-4, the percentage was higher for patients that had received EA.


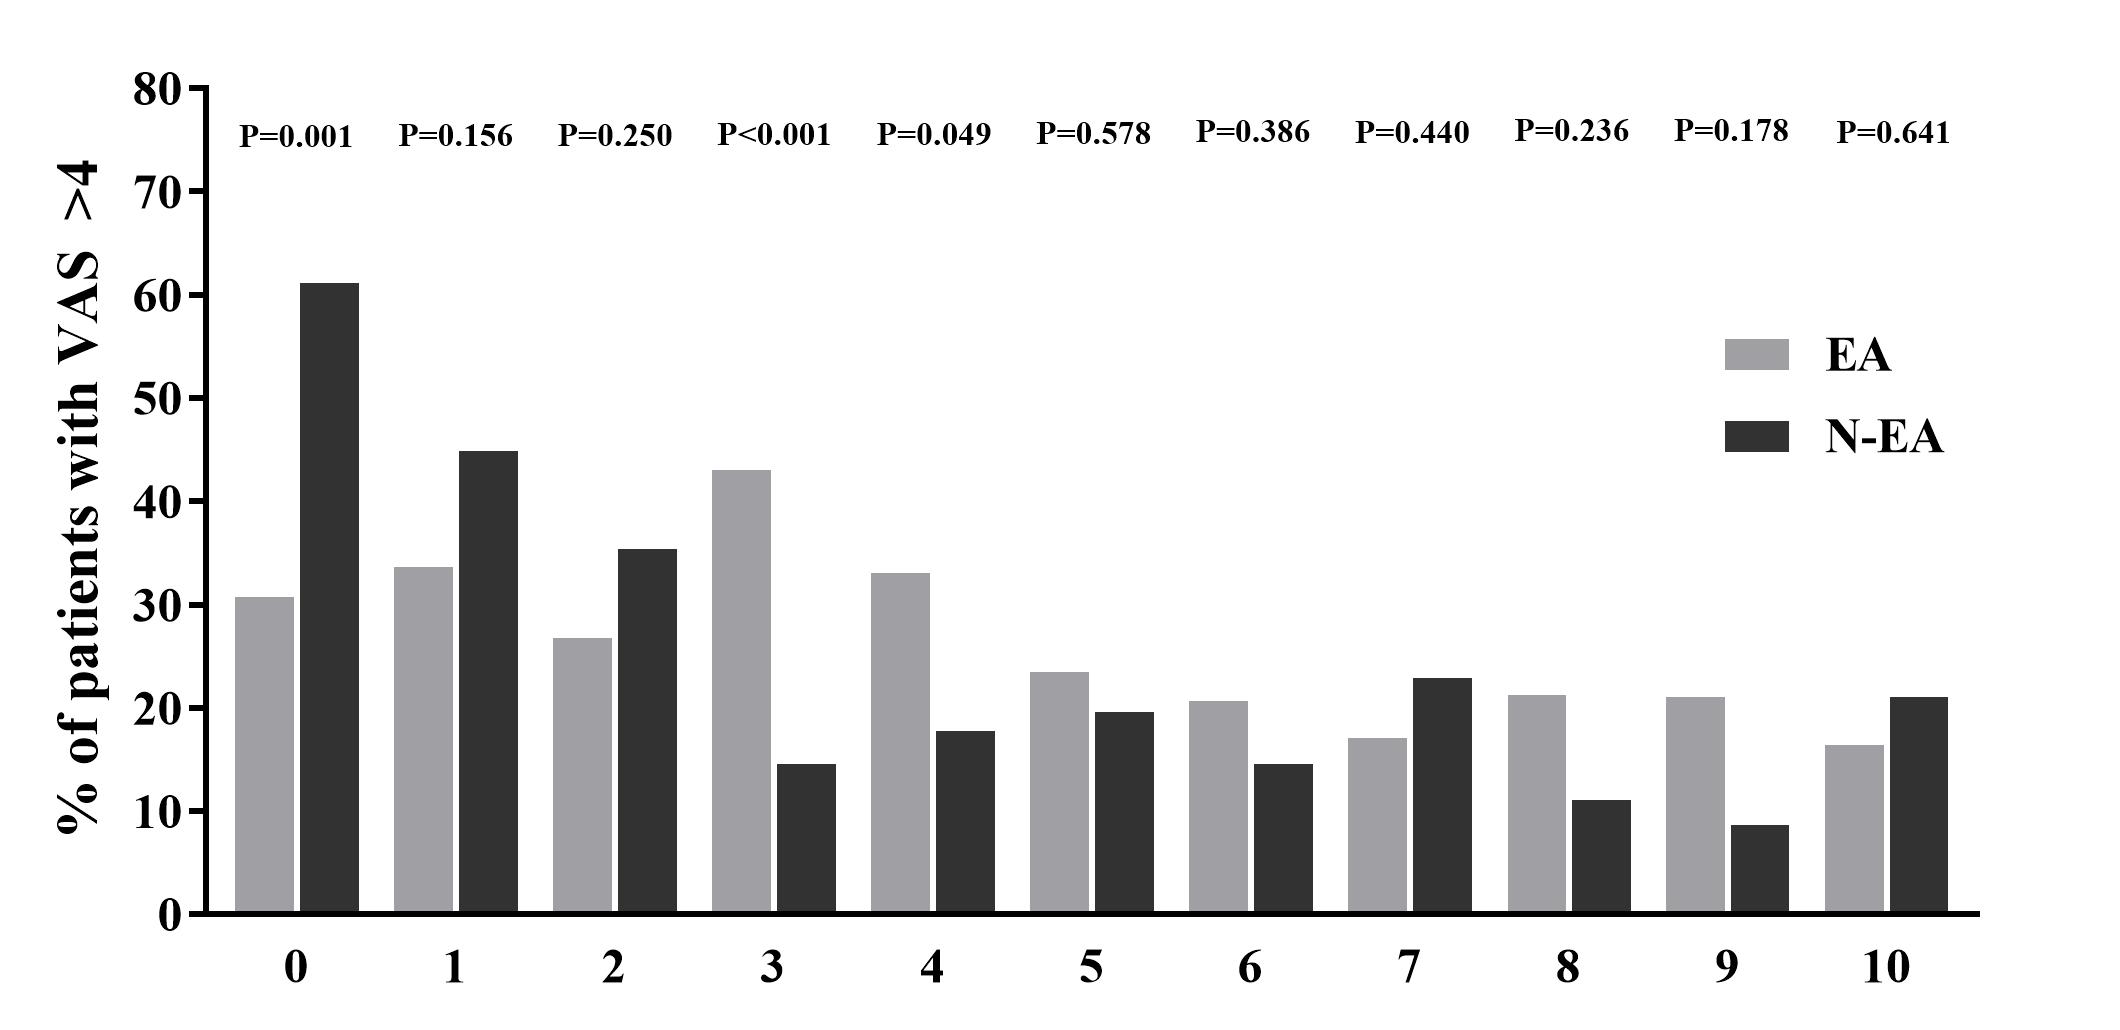


**Figure 1.** Percentage of patients with a postoperative pain score > 4 (on an 11-point scale from 0, no pain to 10, most extreme pain imaginable) for pancreaticoduodenectomy patients that received an epidural analgesia (EA) and those that received another form of pain treatment (non-EA).

In Europe a new form of pain treatment has become available since 2 years, namely postoperative sublingual sufentanil tablets (SST). SST consists of patient-controlled had held device that delivers 15 mug sufentanil micro-tablets at a minimum of 20 min interval. It is currently used as standard of care in multiple hospitals in the Netherlands. In a recent retrospective cohort analysis of 300 patients of patients from several hospitals in the Netherlands including LUMC, Reinier de Graaf Hospital and Maasstad Hospital, we observed low average pain scores following SST treatment in patients after large abdominal and orthopedic surgery (70% of patients with a pain score < 4 on the first postoperative day). We relate this to the pharmacokinetic and pharmacodynamic properties SST. The drug is highly lipophilic and is rapidly absorbed after which it passes the blood-brain barrier within minutes (t½ke0 about 6 min). Due to the sublingual formulation peak concentrations are relatively low and consequently, concentration dependent side effect -such as acute respiratory depression- do not occur. Due to its rapid onset of action, there is little delay in pain relief between the moment of administration and the onset of pain reduction (Figure 2). Hence, we like to ascertain the lack of disadvantage, i.e. non-inferiority of SST *versus* ‘standard-of-care’, (EA or IVPCAM), in our population of PD patients. We will thereto compare the pain data obtained from these standardized pain treatments in our hospital in PD patients. The study will be performed at the LUMC and possibly other centers.


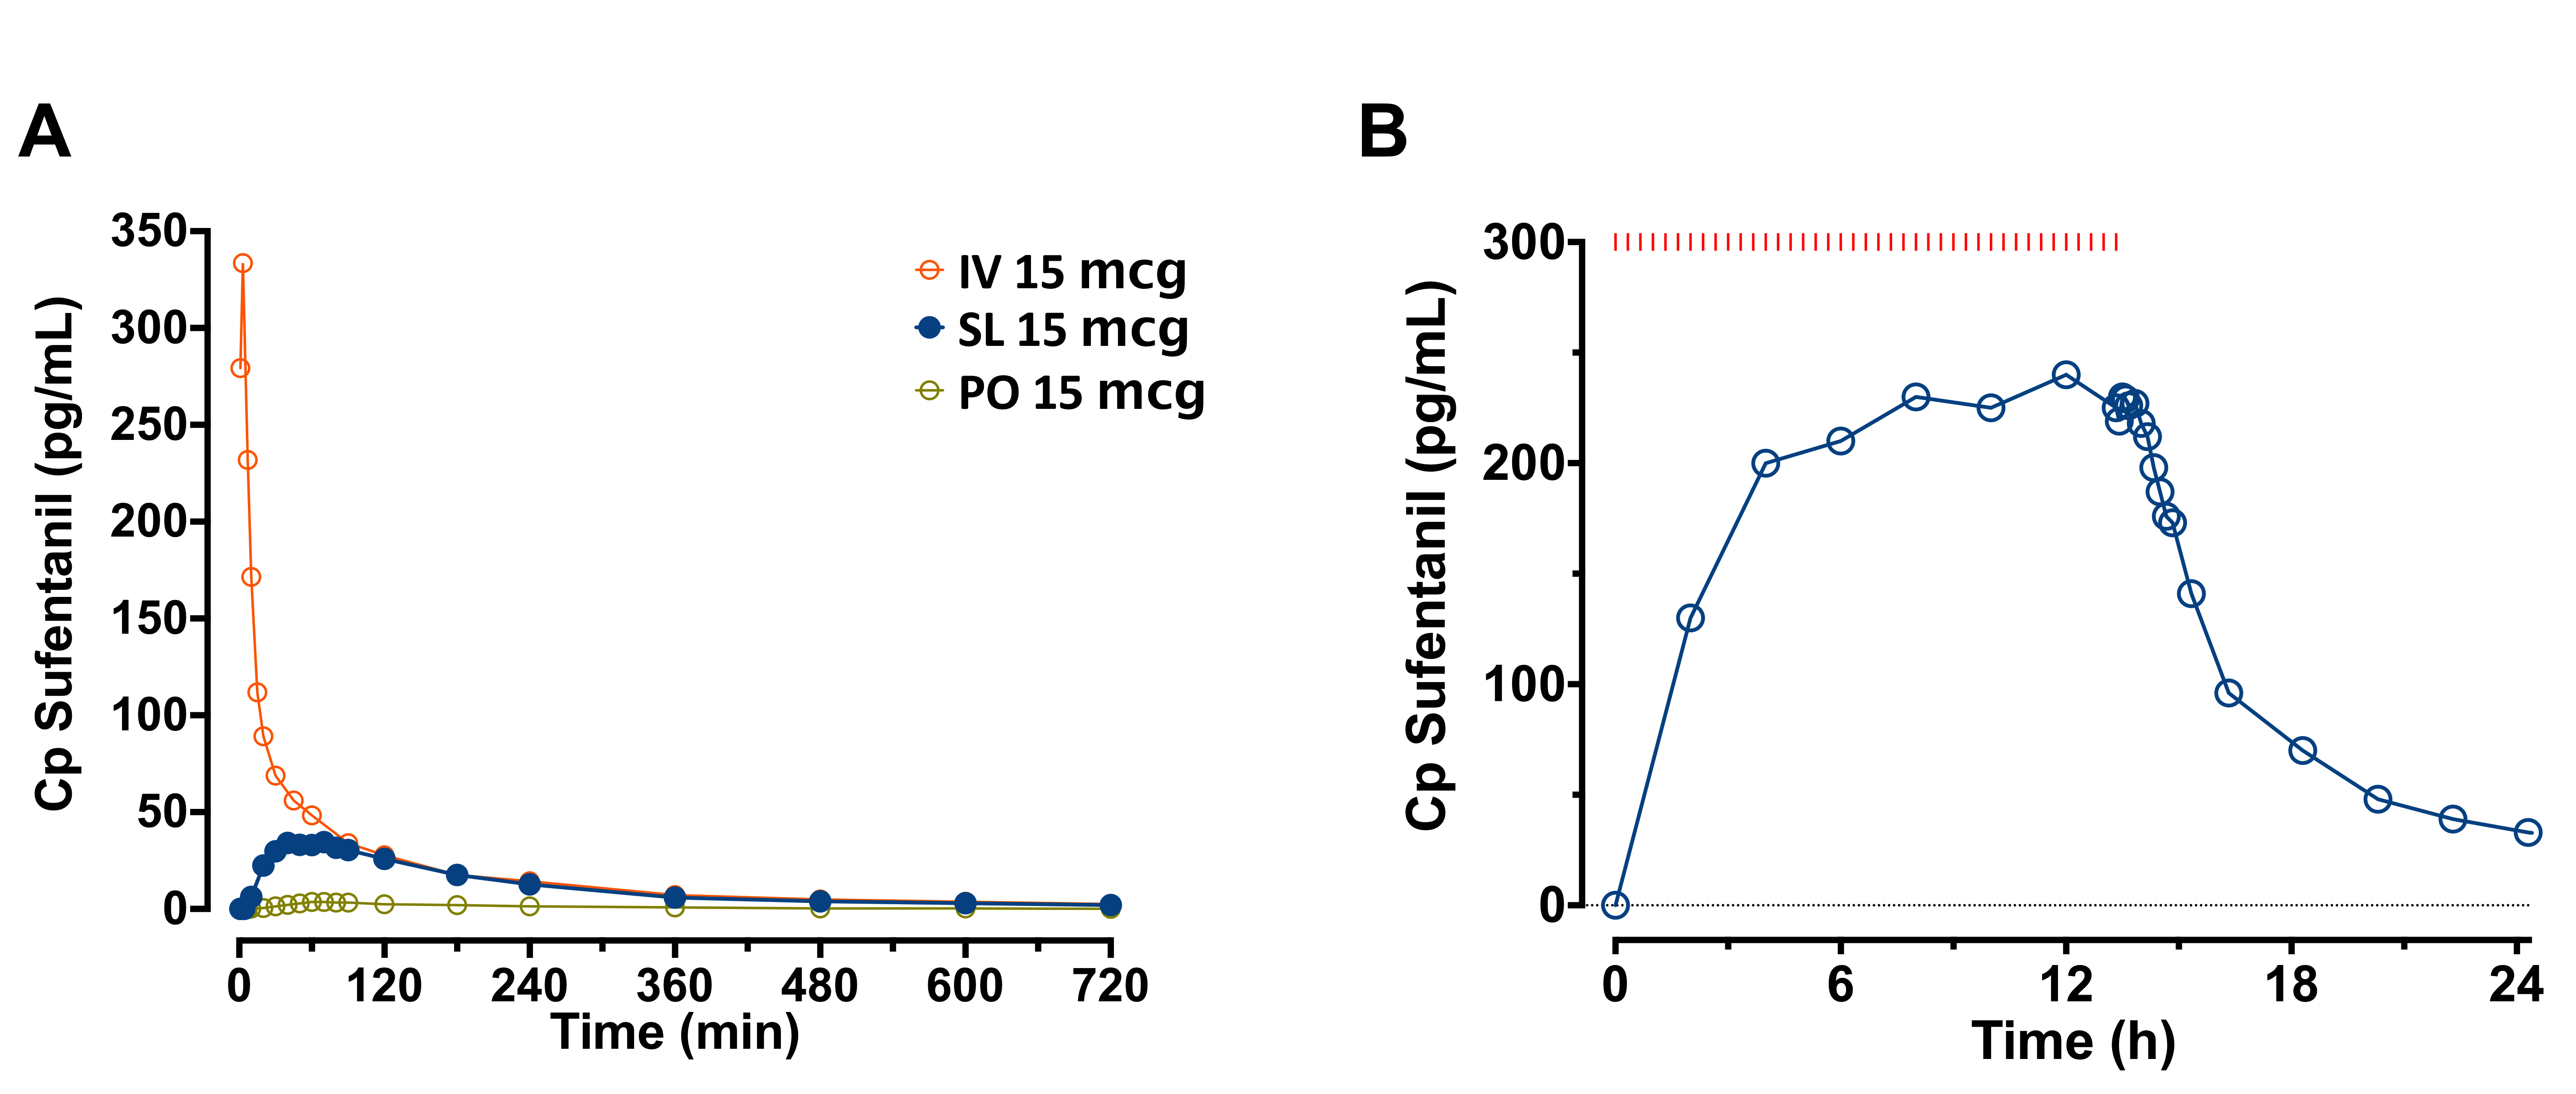


**Figure 2.** Left panel. Plasma concentrations of sufentanil following a single sublingual (SL), intravenous (IV) and oral (PO) administration. Right panel. Plasma concentrations of sufentanil following multiple sublingual administrations. Data from van de Donk et al. Anaesthesia 2018, in press.

In the current study we will assess the postoperative pain scores following techniques that are currently considered standard-of-care in our hospitals:

- Patient controlled administration of SST (15 μg) following an intraoperative morphine bolus and titration with morphine boluses upon recovery to a pain score of 4 or less.
- EA (thoracic epidural catheter placed before surgery; patient controlled epidural analgesia following surgery) or IVPCAM (opiates according to protocol during surgery; intravenous patient controlled analgesia with morphine following surgery).

**Objectives & hypothesis**

- Primary objective**:** To compare the efficacy of postoperative pain treatments with SST *versus* ‘standard-of-care’ in patients following PD in terms of pain intensity and patient satisfaction.
- Secondary objectives**:** To compare outcome parameters between treatment groups.

We hypothesize SST to be an equi-effective (i.e., non-inferior) analgesic compared to ‘standard-of-care’ in the treatment of postoperative pain and satisfaction with pain relief in PD patients.

**Study design**

This is an investigator-initiated, open-label, multicenter, strategy, randomized controlled trial in which patients will be randomized to receive either an SST or ‘standard-of-care’ for postoperative pain treatment postoperatively.

1. **METHODS: PARTICIPANTS, STRATEGIES, OUTCOMES**

**Study setting**

This trial will be conducted solely in the Netherlands.

**Eligibility criteria**

- Inclusion criteria: ASA class 1-3 patients, aged 18 and older that will undergo an elective PD under general anesthesia will be selected to participate in the study.
- Exclusion criteria: Patients that are unable to give written informed consent. Patients with: a contra-indication for (EA and IVPCAM) or SST (e.g. allergies, coagulopathies), inability to operate the SST system, chronic opioid use (>12 weeks), complex chronic pain disorders, liver failure (Child-Pugh class C).

**Strategies**

The anesthetics (type and dose) given during general anesthesia will be left to the discretion of the attending anesthesiologist and/or resident.

Patients randomized to the SST will receive long-acting intravenous opiates (e.g. morphine) prior to the end of surgery. In the PACU pain will be assessed using the 11-point numerical rating scale (NRS; from 0, no pain to 10, most extreme pain imaginable). In case of pain score > 4, an opiate will be given according to local protocol. When pain scores are 4 or less and patients are able to operate the SST system (e.g. awake enough after general anesthesia), the SST system will be started. Additionally all patients will receive 4 times daily paracetamol 1000 mg ± an NSAID/metamizol 3 times daily.

Patients randomized to the ‘standard-of-care’-arm will receive either EA or IVPCAM according to local protocol:

- EA: At LUMC, following induction the epidural analgesic medication will be administered (ropivacaine 0.75%) as bolus 6-12 mL followed by a continuous infusion (ropivicaine 0.2%/sufentanil 0.75 mug/mL; 6-10 mL/h; with the possibility of giving an additional bolus). In the PACU (recovery/ward) pain will be assessed using the 11-point numerical rating scale (NRS; from 0, no pain to 10, most extreme pain imaginable) at regular intervals. In case of pain score > 4, epidural bolus infusions will be permitted and the patient controlled EA (PCEA 1-2 mL bolus, 20-min lockout) system will be started according to local protocol. Additionally, all patients will receive 4 times daily paracetamol 1000 mg and an NSAID/metamizol if allowed according to local protocol.
- IVPCAM: At LUMC, opiates will be given according to local protocol during surgery. In the PACU (recovery/ward) pain will be assessed using the 11-point numerical rating scale (NRS; from 0, no pain to 10, most extreme pain imaginable) at regular intervals. Patients receive iv morphine bolus doses to reduce pain scores 4 or less, thereafter IVPCAM will be started. IVPCAM will be administered by a continuous infusion of 0.5 mg/h. In addition, the patients can administer a 1 mg bolus at a 5 min interval with a maximum dosage of 28 mg per 4 h. Furthermore, patients receive 1 g acetaminophen 4 times daily.

In case of insufficient pain relief during the course of treatment, patients may receive rescue pain relief according to local protocol, i.e. conversion to IVPCAM or to EA; if this does not help, IV ketamine is added (up to 10 mg/h).
 After 3-6 days postoperatively both the SST system and the ‘standard-of-care’ will be terminated and replaced by naproxen/NSAID, paracetamol, an oral or subcutaneous opiate depending on the pain score (and local protocol). At LUMC:

- NRS < 4: paracetamol 4 times daily 1000 mg + naproxen 500 mg 3 times daily;
- NRS 4-6: oxynorm 5 mg p.o. (max. 6 times/day), combined with to paracetamol ± NSAID as mentioned above;
- NRS > 6: morphine s.c. up to 20 mg (max. 6 times/day), combined with to paracetamol ± NSAID as mentioned above.

**Outcomes**

The main end-point of the study will be ‘mean pain score during postoperative day 1-3’ and ‘mean pain satisfaction score during postoperative day 1-3’.

Secondary end-points include:

- Mean daily pain scores beyond day 3 till discharge

- Mean daily pain satisfaction scores beyond day 3 till discharge

- Overall Benefit of Analgesia Score on day 1, 2 and 3

- Number of patients reporting a NRS > 4 on day 1 till discharge

- Hemodynamics during and following surgery

- Blood loss

- Anesthesia and surgery time

- Anesthetics used during surgery (propofol/sevoflurane/ketamine, remifentanil/ sufentanil, rocuronium/sugammadex)

- Vasoactive medication during and following surgery (noradrenaline/phenylephrine/ephedrine/atropine)

- Fluid balances and weight during peri- and postoperative period

- Duration of postoperative analgesia treatment (EA and SST)

- Rescue pain medication (reason, type, dose and duration)

- Occurrence of nausea, vomiting, pruritus.

- Complications during surgery (anesthetic and surgical complications)

- General postoperative complications (e.g. anastomotic leakage, infectious complications)

- Pancreatic surgery specific complications as defined by the International Study Group of Pancreatic Surgery (Postoperative Pancreatic Fistula, Postpancreatectomy Hemorrhage, Bile Leakage, Delayed Gastric Emptying, Chyle Leak)

- Reinterventions/Clavien-Dindo classification

- Laboratory findings during peri- and postoperative period

- Unplanned (re)admission to the ICU

- PACU stay/ICU stay/hospital stay

- Unplanned 30-dayr hospital readmission

- Mortality within 30-days.

**Time-line**

|  | **STUDY PERIOD** | | | | | | | |
| --- | --- | --- | --- | --- | --- | --- | --- | --- |
|  | **Enrolment** | **Allocation** | **Post-allocation** | | | | | **Close-out** |
| **TIMEPOINT**** | ***-t1*** | **0** | ***t1*** | ***t2*** | ***t3*** | ***t4*** | ***etc.*** | ***tx*** |
| **ENROLMENT:** |  |  |  |  |  |  |  |  |
| **Eligibility screen** | X |  |  |  |  |  |  |  |
| **Informed consent** | X |  |  |  |  |  |  |  |
| **Allocation** |  | X |  |  |  |  |  |  |
| **STRATEGIES:** |  |  |  |  |  |  |  |  |
| ***EA*** |  |  |  |  |  |  |  |  |
| ***STT*** |  |  |  |  |  |  |  |  |
| **ASSESSMENTS:** |  |  |  |  |  |  |  |  |
| ***Patient characteristics*** | X | X |  |  |  |  |  |  |
| ***Surgical & anesthesiological data*** |  |  | X |  |  |  |  | X |
| ***Postoperative data*** |  |  |  | X | X | X | X | X |

*Recommended content can be displayed using various schematic formats. See SPIRIT 2013 Explanation and Elaboration for examples from protocols. **List specific time-points in this row.

**Figure 3.** Example template of recommended content for the schedule of enrolment, strategies, and assessments.*

**Sample size calculation**

We assume non-inferiority between groups. If there is truly no difference between the two treatments and the standard deviation of the effect is 1.5 (retrospective data of mean pain score during postoperative day 1-3 in patients with EA undergoing pancreatectomy), then 36 patients are required to be 90% certain that the lower limit of a one-side 95% confidence interval will be above the non-inferiority limit of -1.5 (PASS Software version 15.0.4). Considering 25% of patients (retrospective data of our own hospital) undergo only surgical exploration instead of surgical resection: in total, 47 patients are required.

**
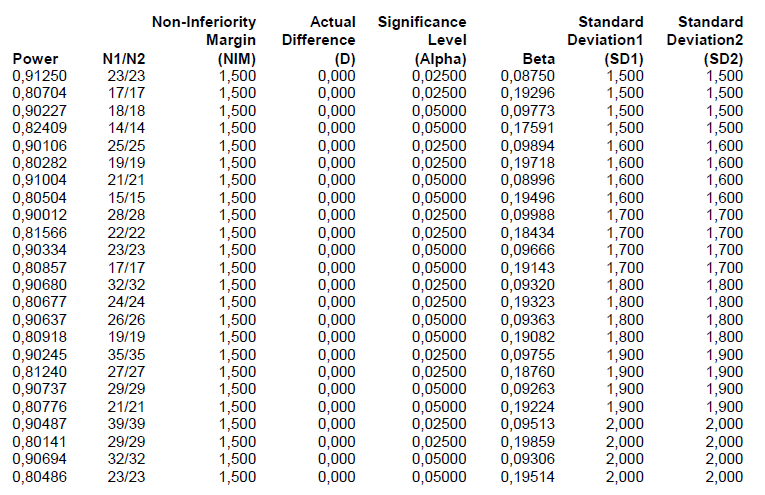
**

**Figure 4.** Sample size calculation

First amendment (March 2019): After the study protocol was amended, (i.e. change of the randomization for SST or EA to SST or ‘standard-of-care’) there will not be change in sample size calculation. The standard deviation of the effect is 1.1 in the IVPCAM patients (retrospective data of mean pain score during postoperative day 1-3 in patients with undergoing pancreatectomy). This standard deviation is smaller than used in the original sample size calculation. With the sample size of 80 patients (106 patients, taking irresectable patients into account) this study will have adequate power, also after the protocol change. This change was made in consultation with a senior statistician (H. Putter).

Second amendment(November 2019): Change of the non-inferiority limit from -1.0 to -1.5. The sample size required is 36 patients (excl. 25% expected surgical exploration instead of surgical resection). This change was made in consultation with a senior statistician (H. Putter).

**Recruitment**

Patients will be approached to participate in the studyafter approval is obtained from the local Medical Ethics Committee.Patients will be approached for participation during the preoperative screening visit and the use of the SST system, EA and IVPCAM will be explained to them by either the surgeon or the anesthesiologist. If the patient is interested in the study he/she will receive a patient information sheet with study details. If the patient approves participation he/she will have to give informed consent prior to enrollment.

1. **METHODS: ASSIGNMENT OF STRATEGIES**

**Allocation**

After informed consent is obtained, randomization will be done centrally using a web-based generator. Patients will be randomized the day before surgery and randomization will be stratified by center and by surgical technique (open, laparoscopic, robotic).

**Blinding**

Blinding of study participants and investigators seems impractical since the strategies (STT and ‘standard-of-care’) are evidently different.

1. **METHODS: DATA COLLECTION, MANGEMENT, ANALYSIS**

**Data collection methods**

Pain scores are collected in the PACU at 5-20 min intervals. When the patients are discharged to the ICU, 24-h PACU or to the ward pain scores will be obtained 3 times per day. All pain scores (11-point scale: Numerical Rating Scale) are registered in the Patient data Monitoring System (PDMS: HiX).

Satisfaction scores are obtained at the end of each hospital day and will be scored on an 11-point Likert scale ranging from 0 (not satisfied at all) to 10 (fully satisfied). Overall Benefit of Analgesia Scores are measured and registered in HiX by the treating physician on the Post Anesthesia Care Unit (on day 1) and Acute Pain Service on day 2 and 3).

Additional data that are collected (up to 30 days after surgery, or at discharge in case admission exceeds 30 days) include:

- Patient characteristic: age, sex, weight, height, BMI, comorbidity, drug (medication) prescription, ASA class, preoperative laboratory findings, indication for surgery

- Hemodynamics during and following surgery

- Blood loss

- Type- and time of surgery/anesthesia

- Anesthetics used during surgery (propofol/sevoflurane/ketamine, remifentanil/sufentanil, rocuronium/sugammadex)

- Vasoactive medication (dose and duration) during an following surgery (noradrenaline/phenylephrine/ephedrine/atropine)

- Fluid balances and weight during peri- and postoperative period

- Duration of postoperative analgesia treatment (EA and SST)

- SST/EA use/dose

- Occurrence of nausea, vomiting, pruritus.

- Rescue medication (reason, type, dose and duration)

- Daily pain satisfaction score (satisfaction with pain relief/overall satisfaction)

- Complications during surgery (anesthetic and surgical complications)

- Postoperative course and complications/reinterventions/Clavien-Dindo classification

- Laboratory findings during peri- and postoperative period

- Unplanned admission to the ICU

- PACU stay/ICU stay/hospital stay

- Unplanned 30-day readmission

- Adjuvant therapy

- Mortality within 30-days.

**Data management**

All data will be stored electronically in the online CASTOR database during data collection. Data will be extracted from Hix electronically and uploaded in CASTOR at fixed time-points. Furthermore, data from the Dutch Pancreatic Cancer Audit will be uploaded/recorded in CASTOR. Additional data will be extracted manually from Hix and recorded in CASTOR. To improve accuracy of data entry and coding the following will be implemented: verification of data (automatically: format and range; in the online CASTOR database) and source documentation (manually) of a random subset of data to identify missing or inaccurate values. During data analysis, all data will be stored in a DataSafe provided by Advanced DataManagement.

**Statistical methods**Statistical analysis will be performed using the SPSS statistical software package. Primary analysis will compare the two treatment groups (intention-to-treat) using parametric and non-parametric tests, depending on their distribution, for continuous variables and Chi-square test or Fisher’s Exact test, when appropriate, for categorical variables. Secondary analysis will include a per protocol analysis. The main study end-point (mean pain score for postoperative day 1-3) will be tested at the p < 0.05 level for significance. In case of >10% missing data for a variable, modern imputation methods will be performed. Sensitivity analyses will be performed with(out) imputed data and for patients included prior to the change in protocol (March 04, 2019) and after the protocol change. In case of statistically or clinically significant differences in primary outcomes, the patients included before the protocol changed will be reported separately and will be replaced with extra included patients (to maintain adequate power).

1. **METHODS: MONITORING**

**Patient Safety Monitoring**

This study bears minimal risk, therefore the investigators and the LUMC ethics committee (Commissie Medische Ethiek) consider the constitution of a Data Monitoring Committee (DMC) not necessary.
 Interim analysis will not be performed, since the recruitment period is relatively short and the primary (–and secondary) outcomes concerning this trial are not life-threatening.

**Study Monitoring**

The study will be monitored using the LUMC monitoring pool according to the requirements of the NFU for a study with minimal risks. The risk is set at minimal since both treatments (SST and ‘standard-of-care’) are part of daily clinical practice.

1. **SAFETY**

**Recovery after pancreaticoduodenectomy**

Pancreaticoduodenectomy remains a complex and technically demanding procedure. With improvements in surgical technique, perioperative management and dedicated high-volume pancreatic institutions, mortality rates are now in the order of 2-3%. However, overall morbidity rates remain high at 30-50%, whereas rates of morbidity requiring invasive intervention (endoscopic, radiological, and surgical) are approximately 20-30%.

A ‘normal’ pancreaticoduodenectomy takes 4-6h and intraoperative blood loss >1000 mL is not uncommon. Standard postoperative care include: nasogastric tube, one or multiple intra-abdominal drains, arterial line, multiple intravenous lines, central venous catheter, thromboprophylaxis, prophylactic antibiotics, proton pump inhibitors, somatostatin analogues and an urinary catheter.

Patients are routinely monitored on the Post Anesthesia Care Unit for the first 24h. Most patients require hemodynamic support (due to extent of the resection and the accompanying Systemic Inflammatory Response Syndrome) and need optimization of pain treatment during the first 24h.
 Symptoms that can be expected to naturally transient during ‘normal’ recovery include: fever (up to 38.5 degrees Celsius), nausea, vomiting, ileus, obstipation and weight gain (mainly fluid) up to 7-8 kg.

Laboratory findings that can be expected to naturally transient during ‘normal’ recovery include: hemoglobin decrease (up to 2 mmol/L) requiring transfusion of 1-3 packed red blood cells, C-reactive protein up to 300 mg/L, white blood cell count up to 20 x 109/L and electrolyte disorders.
 Imaging findings that can be expected to naturally transient during ‘normal’ recovery include; atelectasis of the lungs and pleural effusion on thoracic imaging and postoperative abdominal free fluid and air and mild postoperative inflammation on abdominal imaging.
 The normal length of hospital stay after pancreaticoduodenectomy is 11-13 days.

**Adverse Events**

An AE is any untoward medical occurrence in a patient or clinical investigation subject administered a pharmaceutical product, including placebo, and which does not necessarily have to have a causal relationship with treatment. An AE can be:

- Any unfavorable and unintended sign (including an abnormal laboratory finding), symptom, or disease temporally whether or not considered related to the study medication.
- Any new disease or exacerbation of an existing disease.
- Any deterioration in protocol-required or non-protocol-required measurements of laboratory value or other clinical tests (e.g. ECG or X-ray) that results in symptoms, a change in treatment, or discontinuation from study medication.
- Recurrence of an intermittent medical condition (e.g. headache) not present at baseline.

Subjects with AEs that are ongoing at the subject’s completion/discontinuation visit (last treatment visit) will be followed up for *7* days and the follow up information will be recorded in the digital CRF (CASTOR). New AEs that are reported in the *7* days following the subject’s completion/discontinuation visit will be recorded in the AE section of the CRF. Any AE that is still ongoing 7 days after the completion/discontinuation visit will have an end date of ‘ongoing’ in the CRF, however the investigator will continue to follow up ongoing AEs and record information in the source documents. SAEs will be followed until the event resolves or the event or sequels stabilize and this information will be reported to the Sponsor.

***Reporting of AEs***

For subjects who receive study medication, all AEs (learned through spontaneous reports, subject interview) starting from providing informed consent for study participation through the period beyond study completion will be collected on the AE pages of the digital CRF. The medical records of included patients will be checked once a week to detect and follow-up AE. Also, close contact will be held with the treating physicians. Events that fit in the above described ‘recovery after pancreaticoduodenectomy’ will not be reported.

For each AE on the AE pages of digital CRF, the following information will be recorded: AE (e.g. headache), start date, start time, stop time, severity, study medication action taken, other action taken, relationship to study medication, outcome, seriousness. A cluster of signs and symptoms that results from a single cause should be reported as a single AE (e.g. fever, elevated WBC, cough, abnormal chest x-ray, etc. can all be reported as “pneumonia.”).

***Criteria for Assessing Severity***

The Investigator will evaluate the comments of the subject and the response to treatment in order that he/she may judge the true nature and severity of the AE. Severity refers to the accumulated intensity of discomfort/impairment of health since the last recording of AEs and will be assessed according to the following criteria:

- *Mild:*Awareness of sign, symptom, or event, but easily tolerated.
- *Moderate:* Discomfort enough to cause interference with usual activity and may warrant intervention.
- *Severe:*Incapacitating with inability to do usual activities or significantly affects clinical status and warrants intervention.

The criteria for assessing severity are different to those used for seriousness (see below for the definition of an SAE).

***Criteria for Assessing Causality***

The question of the relationship of an AE to study medication should be determined by the Investigator after thorough consideration of all facts that are available. Assessment of causality is based on considering associative connections (time or place), pharmacological explanations, previous knowledge of the drug, presence of characteristic clinical or pathological phenomena, exclusion of other causes, and/or absence of alternative explanations. The causal relationship of an AE to study medication will be assessed according to the following criteria (based on World Health Organisation definitions):

- *Not related:* Temporal relationship to study medication administration is missing or implausible, or there is an evident other cause.
- *Unlikely to be related*: Temporal relationship to study medication administration makes a causal relationship improbable; and other drugs, chemicals, or underlying disease provide plausible explanations.
- *Possibly related*:Reasonable time sequence to administration of study drug, but event could also be explained by concurrent disease or other drugs or chemicals. Information on drug withdrawal may be lacking or unclear.
- *Probably related*:Reasonable time sequence to administration of study drug, but unlikely to be attributed to concurrent disease or other drugs or chemicals, and which follows a clinically reasonable response on withdrawal (dechallenge). Rechallenge information is not required.
- *Definitely related***:** Plausible time relationship to study medication administration; event cannot be explained by concurrent disease or other drugs or chemicals. The response to withdrawal of the drug (dechallenge) should be clinically plausible. The event must be definitive pharmacologically or phenomenologically, using a satisfactory rechallenge procedure if necessary.

**Serious Adverse Events**

A SAE is any untoward medical occurrence that at any dose:

- Results in death;
- Is life-threatening (i.e. the subject was at immediate risk of death from the AE as it occurred. This does not include an event that, had it occurred in a more severe form or was allowed to continue, might have caused death);
- Requires inpatient hospitalisation or prolongation of existing hospitalisation;
- Results in persistent or significant disability/incapacity;
- Is a congenital anomaly/birth defect (in the child of a subject who was exposed to the study medication);
- Is a medically important event or reaction (see below).

Other important medical events that may not be immediately life-threatening or result in death or hospitalization but may, based on appropriate medical judgment, jeopardize the subject or require intervention to prevent one of the outcomes in the definition of SAE listed above should also be considered SAEs.

All SAEs, including those occurring up to 7 days following the subject’s completion/discontinuation visit (subject’s last treatment visit), will be recorded on the AE pages of the CRF. In addition, SAEs must be reported to the Sponsor. Subjects with SAEs must be followed until the event resolves or the event or sequels stabilize.

***Reporting of SAEs***

The medical records of included patients will be checked once a week to detect and follow-up SAE. Also, close contact will be held with the treating physicians.

All SAEs must be reported to the Sponsor within one business day of first knowledge of the SAE. In the initial report, all of the information requested that is available should be provided: the reportable event, the study medication (if known), the protocol number, the subject number, and the Investigator name. Follow-up information, or new information available after the initial report, should be actively sought and reported to the Sponsor.

**Data Monitory Committee (DMC)**

This study bears minimal risk, therefore the investigators and the LUMC ethics committee (Commissie Medische Ethiek) consider the constitution of a Data Monitoring Committee (DMC) not necessary.

1. **ETHICS AND DISSEMINATION**

**Ethical approval**

The protocol, possible protocol amendments, the patient information form, informed consent form and any other study related information or documents will be reviewed and approved by the LUMC ethics committee (Commissie Medische Ethiek) before subjects are screened for study entry. The Investigator will submit periodic reports and inform the Commissie Medische Ethiek of any reportable adverse events (AEs) per ICH guidelines and local ethical committee standards of practice.

**Ethical conduct of the study**

This study will be conducted in accordance with LUMC standard operating practices, which are designed to ensure adherence to Good Clinical Practice (GCP) guidelines as required by the following:

- Declaration of Helsinki, version Fortaleza, Brazil, 2013.
- ICH Guideline for GCP (CPMP/ICH/135/95) of the European Agency for the Evaluation of Medicinal Products, Committee for Proprietary Medicinal Products, International Conference on Harmonization of Pharmaceuticals for Human Use. (Note for Guidance on Good Clinical Practice, 2002).
- European Union (EU) Clinical Trials Directive 2001/20/EC on the regulation of clinical trials in the EU and the implementation of GCP.
- GCP Directive 2005/28/EC.
- This study will be conducted in accordance with national and local laws.

**Protocol amendments**Modifications to the protocol which may change the conduct of the study, potential benefit of the patient or may affect patient safety, including changes of study objectives, study design, eligibility criteria, sample sizes, study procedures, or significant administrative aspects will require a formal amendment to the protocol. Such amendment will be approved by the Commissie Medische Ethiek prior to implementation and notified to the health authorities in accordance with local regulations.

Administrative changes of the protocol are minor corrections and/or clarifications that have no effect on the way the study is to be conducted. These administrative changes will be documented in a memorandum. The Commissie Medische Ethiek may be notified of administrative changes at the discretion of Principle Investigator.

**Subject information and consent**

All subjects will be provided with oral and written information describing the nature and duration of the study and the procedures to be performed. Each subject will be given a copy of the informed consent and written information. The subject will be asked to sign an informed consent form prior to any study-specific procedures being performed.

**Ancillary studies**

Informed consent will be obtained to acquire approval for using participants’ data for ancillary studies. No additional biological samples will be obtained in this trial.

**Confidentiality**

The online database CASTOR and DataSafe from Advanced DataManagement are only accessible for involved investigators. The informed consents will be stored in a locked metal cabinet at the Department of Anesthesiology.

**Declaration of interests**

The authors report no conflict of interests.
